# Supplementary material for: An outcome-based definition of low birthweight for births in low- and middle-income countries: a secondary analysis of the WHO global survey on maternal and perinatal health
Source: PubMed Central journal article supplement (PMC6535858; doi:10.1186/s12887-019-1546-z), 2019-05-27
Supplement: 12887_2019_1546_MOESM1_ESM.pdf [file 12887_2019_1546_MOESM1_ESM.pdf]

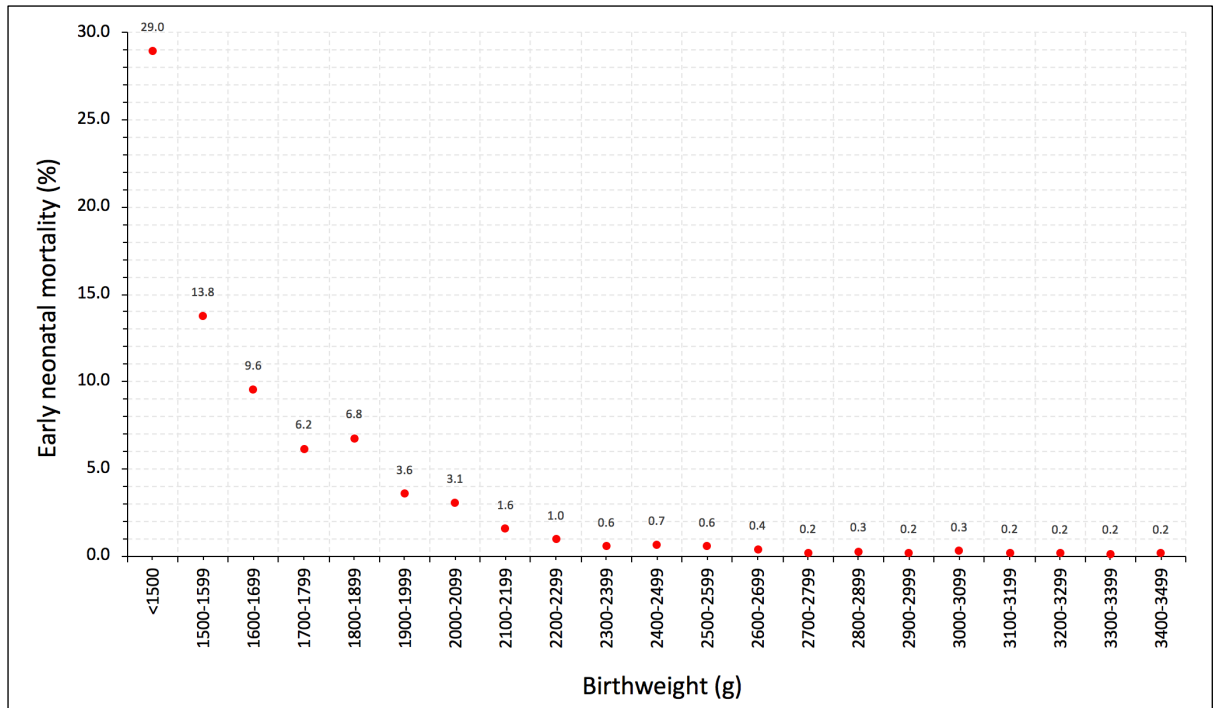

**Additional file 1** The percentage of early neonatal mortality by 100 g interval of birthweights
